# Supplementary material
Source: MDPI journal article supplement (https://www.mdpi.com/1996-1073/14/13/3856)
Supplement: s1 [file s1]

**Table S1.** Techno-economic analysis for bioCNG in Ghana and Uganda.

| Key assumptions and outcomes                       | Units                              | Smallest system |        | Medium-scale system |          | Largest system |          |
|----------------------------------------------------|------------------------------------|-----------------|--------|---------------------|----------|----------------|----------|
|                                                    |                                    | Uganda          | Ghana  | Uganda              | Ghana    | Uganda         | Ghana    |
| Plant capacity                                     | Nm3/h raw biogas output            | 3.00            | 3.00   | 10.00               | 10.00    | 25.00          | 25.00    |
| LPG cylinder capacity                              | kg                                 | 14.50           | 14.50  | 14.50               | 14.50    | 14.50          | 14.50    |
| LPG refill price                                   | USD/kg                             | 2.60            | 1.08   | 2.60                | 1.08     | 2.60           | 1.08     |
| LPG refill price (14.5 kg cylinder)                | USD/cylinder                       | 37.70           | 15.66  | 37.70               | 15.66    | 37.70          | 15.66    |
| LPG energy density                                 | kWh/kg LPG                         | 13.60           | 13.60  | 13.60               | 13.60    | 13.60          | 13.60    |
| LPG total Energy per cylinder                      | kWh/cylinder LPG                   | 197.20          | 197.20 | 197.20              | 197.20   | 197.20         | 197.20   |
| LPG price on kWh basis                             | USD/kWh LPG                        | 0.19            | 0.08   | 0.19                | 0.08     | 0.19           | 0.08     |
| BioCNG at 97% CH <sub>4</sub> purity               | kWh/Nm <sup>3</sup> Bio CNG        | 9.67            | 9.67   | 9.67                | 9.67     | 9.67           | 9.67     |
| BioCNG density                                     | kg/Nm <sup>3</sup> Bio CNG         | 0.75            | 0.75   | 0.75                | 0.75     | 0.75           | 0.75     |
| BioCNG energy density                              | kWh/kg Bio CNG                     | 12.89           | 12.89  | 12.89               | 12.89    | 12.89          | 12.89    |
| Price bioCNG (equiv. energy content basis)         | USD/kWh BioCNG                     | 0.19            | 0.08   | 0.19                | 0.08     | 0.19           | 0.08     |
| Price bioCNG (equiv. energy content basis)         | USD/kg BioCNG                      | 2.46            | 1.02   | 2.46                | 1.02     | 2.46           | 1.02     |
| Cylinder volume                                    | litre                              | 35.00           | 35.00  | 35.00               | 35.00    | 35.00          | 35.00    |
| BioCNG Cylinder pressure                           | bar                                | 248.00          | 248.00 | 248.00              | 248.00   | 248.00         | 248.00   |
| BioCNG gas volume under pressure                   | Nm <sup>3</sup>                    | 8.68            | 8.68   | 8.68                | 8.68     | 8.68           | 8.68     |
| BioCNG weight under pressure/cylinder              | kg                                 | 6.51            | 6.51   | 6.51                | 6.51     | 6.51           | 6.51     |
| Stored BioCNG energy/cylinder                      | kWh                                | 83.94           | 83.94  | 83.94               | 83.94    | 83.94          | 83.94    |
| Equivalent price of each bioCNG refill             | USD/cylinder CNG                   | 16.05           | 6.67   | 16.05               | 6.67     | 16.05          | 6.67     |
| Volume of agro-waste @12kg waste/Nm3 raw biogas    | kg/day                             | 864.00          | 864.00 | 2,880.00            | 2,880.00 | 7,200.00       | 7,200.00 |
| Price of feedstock                                 | USD/ kg                            | 0.00            | 0.00   | 0.00                | 0.00     | 0.00           | 0.00     |
| Cost of feedstock used                             | £/day                              | 0.00            | 0.00   | 0.00                | 0.00     | 0.00           | 0.00     |
| Volume of raw biogas output from digester          | Nm3/day raw biogas                 | 72.00           | 72.00  | 240.00              | 240.00   | 600.00         | 600.00   |
| Volume of clean bioCNG (57% net yield)             | Nm <sup>3</sup> /day bio CNG clean | 41.04           | 41.04  | 136.80              | 136.80   | 342.00         | 342.00   |
| Gas upgrader output capacity                       | Nm3/h, clean bioCNG                | 1.71            | 1.71   | 5.70                | 5.70     | 14.25          | 14.25    |
| Gas upgrader output capacity                       | kg/h                               | 1.28            | 1.28   | 4.28                | 4.28     | 10.69          | 10.69    |
| Gas upgrader output capacity                       | kg/day                             | 30.78           | 30.78  | 102.60              | 102.60   | 256.50         | 256.50   |
| Total CNG production per day                       | kWh/day                            | 396.86          | 396.86 | 1,322.86            | 1,322.86 | 3,307.14       | 3,307.14 |
| Number of bioCNG cylinders produced                | cylinders/day                      | 4.73            | 4.73   | 15.76               | 15.76    | 39.40          | 39.40    |
| Equiv. 14.5 LPG cylinders replaced by bioCNG       | cylinders/day                      | 2.01            | 2.01   | 6.71                | 6.71     | 16.77          | 16.77    |
| Income from sale of bioCNG                         | USD/day                            | 75.87           | 31.52  | 252.90              | 105.05   | 632.25         | 262.63   |
| Compost produced assuming 10% solid                | kg/day compost                     | 86.40           | 86.40  | 288.00              | 288.00   | 720.00         | 720.00   |
| Market price of compost (semi dry)                 | USD/kg compost                     | 0.06            | 0.06   | 0.06                | 0.06     | 0.06           | 0.06     |
| Income from compost sales                          | USD/day compost                    | 4.80            | 4.80   | 16.00               | 16.00    | 40.00          | 40.00    |
| Total income (BioCNG + fertiliser)                 | USD/day                            | 80.67           | 36.32  | 268.90              | 121.05   | 672.25         | 302.63   |
| Total income (BioCNG + fertiliser)                 | USD/year                           | 26,554          | 11,030 | 88,515              | 36,768   | 221,287        | 91,919   |
| Capex of AD plant                                  | USD                                | 16,667          | 16,667 | 30,556              | 30,556   | 58,333         | 58,333   |
| Capex of bioCNG upgrader and compressor            | USD                                | 25,000          | 25,000 | 35,000              | 35,000   | 60,000         | 60,000   |
| Capex of single gas cylinder                       | USD                                | 663             | 663    | 663                 | 663      | 663            | 663      |
| Capex gas cylinders for 3 days gas storage         | USD                                | 9,397           | 9,397  | 31,324              | 31,324   | 78,309         | 78,309   |
| Total capital cost                                 | USD                                | 51,064          | 51,064 | 96,879              | 96,879   | 196,643        | 196,643  |
| Farm owner—operator wage, £833/month               | USD/year                           | 0               | 0      | 10,000              | 10,000   | 10,000         | 10,000   |
| Labour cost: £150/month × 12 months × no. people   | USD/year                           | 5,000           | 5,000  | 7,500               | 7,500    | 10,000         | 10,000   |
| Land lease cost                                    | USD/year                           | 0               | 0      | 6,944               | 6,944    | 13,889         | 13,889   |
| Total labour and land costs                        | USD/year                           | 5,000           | 5,000  | 24,444              | 24,444   | 33,889         | 33,889   |
| Electricity rate (Uganda)                          | USD/kWh                            | 0.21            | 0.21   | 0.21                | 0.21     | 0.21           | 0.21     |
| Energy consumption by biogas upgrader + compressor | kWh/Nm3 raw biogas                 | 0.50            | 0.50   | 0.50                | 0.50     | 0.50           | 0.50     |
| Power consumption by biogas upgrader + compressor  | kW                                 | 1.50            | 1.50   | 5.00                | 5.00     | 12.50          | 12.50    |
| Cost of electricity for bioCNG + compressor        | USD/day                            | 7.50            | 7.50   | 25.00               | 25.00    | 62.50          | 62.50    |
| Servicing and maintenance cost @10% of capex       | USD/year                           | 5,106           | 5,106  | 9,688               | 9,688    | 19,664         | 19,664   |
| Total overhead & operating cost                    | USD/ year                          | 12,731          | 12,731 | 42,882              | 42,882   | 75,428         | 75,428   |
| Net operating profit                               | USD /year                          | 13,823          | -1,701 | 45,632              | -6,115   | 145,858        | 16,491   |
| Payback period                                     | years                              | 3.69            | -30.02 | 2.12                | -15.84   | 1.35           | 11.92    |
